# Supplementary material for: A reduced graphene oxide/α-cyclodextrin hybrid for the detection of methionine: electrochemical, fluorometric and computational studies
Source: Royal Society of Chemistry journal article supplement (doi:10.1039/c4ay00984c), 2014-01-01
Supplement: c4ay00984c1.pdf [file c4ay00984c1.pdf]

## Supporting Information

### Reduced graphene oxide/ $\alpha$ -cyclodextrin hybrid for detection of methionine: electrochemical, fluorometric and computational study

*Erhan Zor<sup>1,2</sup>, Muhammed Esad Saglam<sup>3</sup>, Sabri Alpaydin<sup>3</sup>, Haluk Bingol<sup>3\*</sup>*

**\*Corresponding author:** Haluk Bingol - email: halukbingol@gmail.com, tel. +903323238220 - 5499, fax: +903323238225

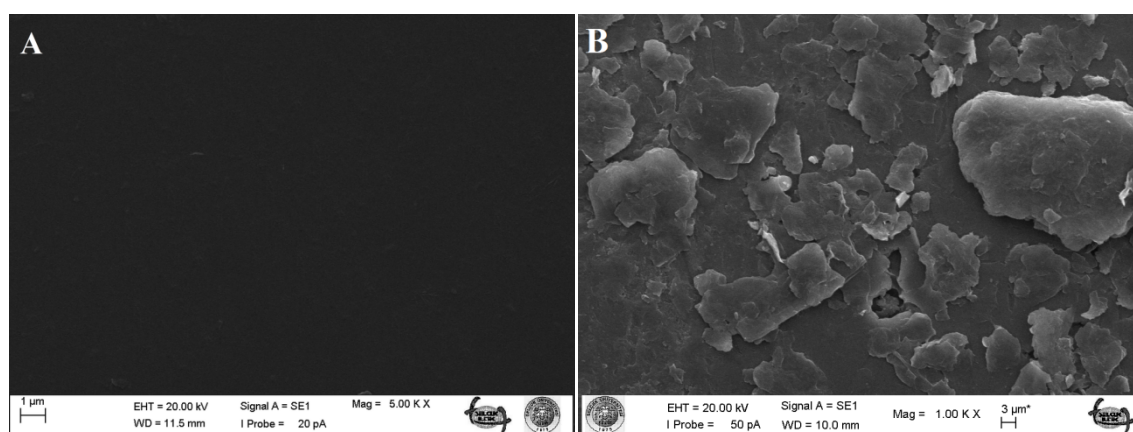

**Figure S1** SEM images of the bare GCE (A) and the *rGO*/ $\alpha$ -CD/GCE (B)

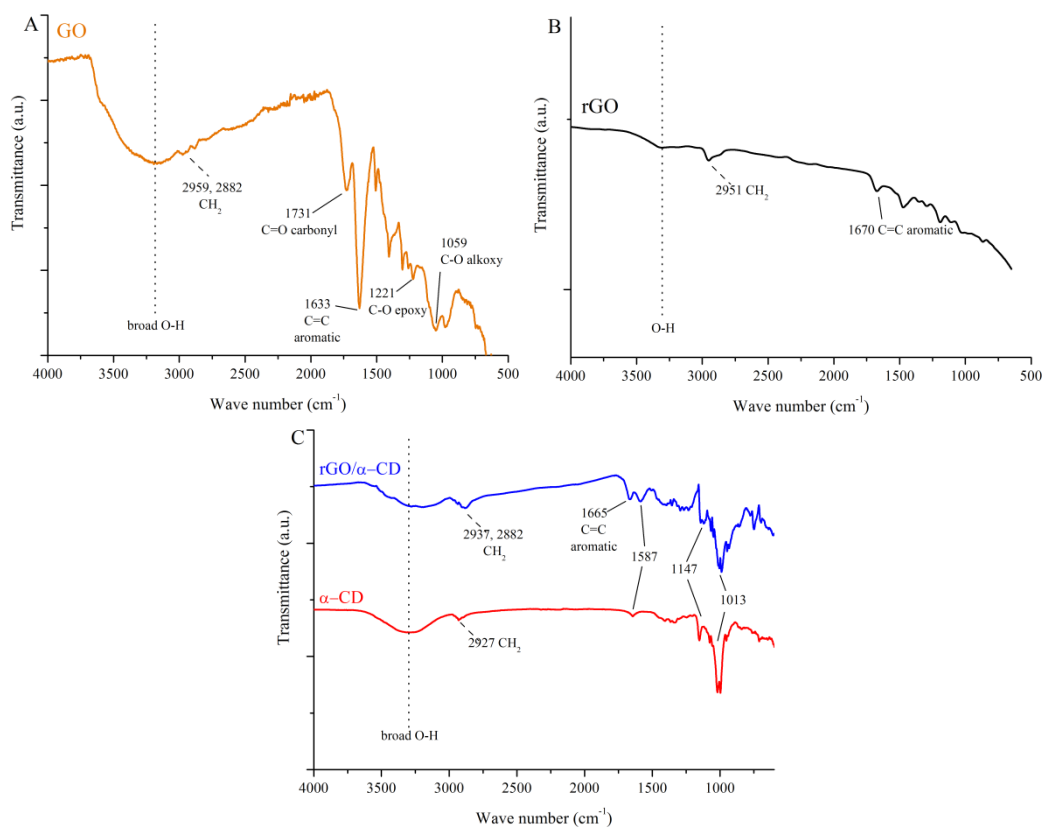

**Figure S2** FT-IR spectra of GO (A), rGO (B),  $\alpha$ -CD and *rGO/ $\alpha$ -CD* (C) plotted on separate axes.
